# Supplementary figures and images for: Microbial Community and Metabolome Analysis of the Porcine Intestinal Damage Model Induced by the IPEC-J2 Cell Culture-Adapted Porcine Deltacoronavirus (PDCoV) Infection
Source: MDPI journal article supplement (doi:10.3390/microorganisms12050874), 2024-04-27

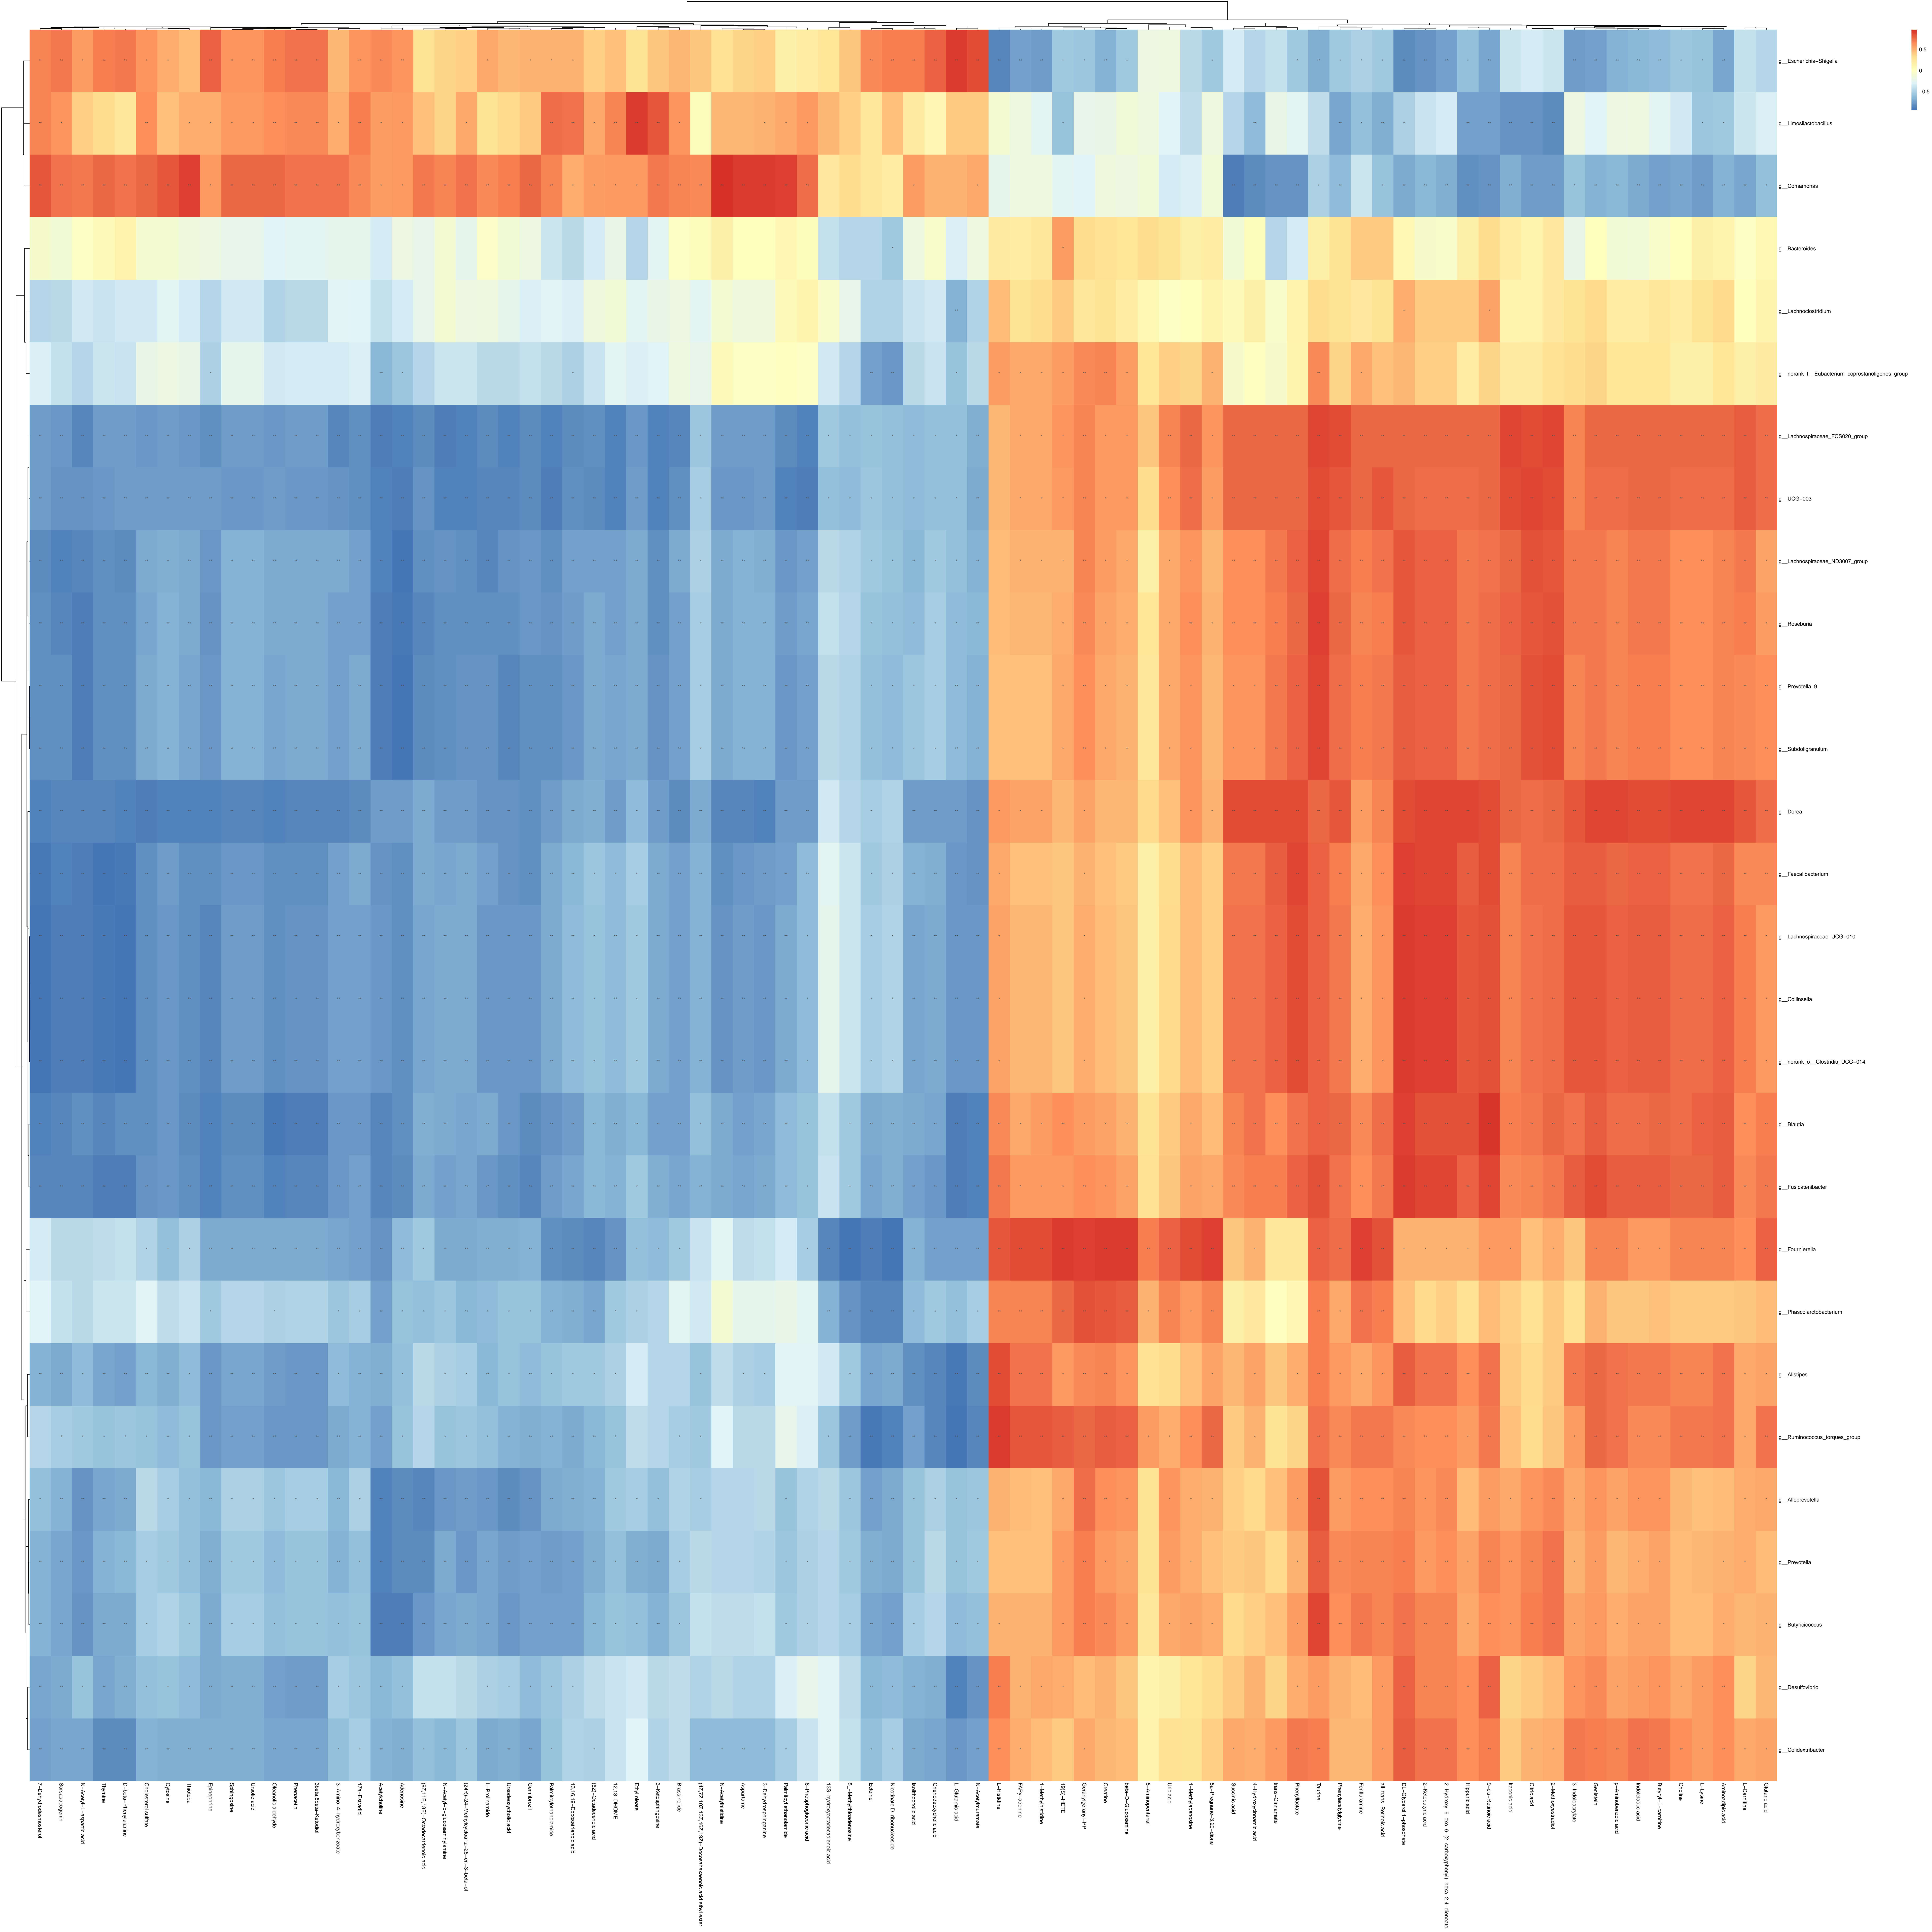

Supplement: s1 [file s1]
